# Supplementary material for: Systolic Blood Pressure and Longitudinal Progression of Arterial Stiffness: A Quantitative Meta‐Analysis
Source: PubMed Central journal article supplement (PMC7660776; doi:10.1161/jaha.120.017804), 2020-08-28
Supplement: JAH3-9-e017804-s001.pdf [file JAH3-9-e017804-s001.pdf]

# **SUPPLEMENTAL MATERIAL**

## Data S1.

### ***Search Strategy:***

Pubmed and EMBASE were searched with the following terms:

((("arterial stiff\*" OR "arterial elasticity" OR "arterial compliance" OR "arterial distensibility" OR "arterial calcification" OR "vascular stiff\*" OR "vascular elasticity" OR "vascular compliance" OR "vascular distensibility" OR "vascular calcification" OR "carotid stiff\*" OR "carotid elasticity" OR "carotid compliance" OR "carotid distensibility" OR "carotid calcification" OR "aortic stiff\*" OR "aortic elasticity" OR "aortic compliance" OR "aortic distensibility" OR "aortic calcification" OR "pulse wave velocity" OR "pulse wave transit time" OR "pulse transit time" OR "cfPWV" OR "baPWV" OR "PWV" OR "cardio-ankle vascular index" OR "arterial stiffness index" OR "HASI" OR "AASI" OR "ABPI" OR "CAVI" OR "ankle-brachial pressure index" OR "ankle-brachial index" OR "modulus of elasticity" OR "young's modulus" OR "elastic modulus" OR "pulse wave analysis" OR "augmentation index" OR "PWA" OR "AIx" OR "pulse pressure") AND ("randomi?ed control trial" OR "cohort" OR "ecological stud\*" OR "longitudinal" OR "follow-up" OR "randomised control\* trial" OR "RCT" OR "health database" OR "case-control" OR "prospective" OR "population-based" OR "clinical trial" OR "long-term" OR "progression"))

**Table S1. Inclusion and Exclusion criteria.**

| <b>Inclusion</b>                                                                                         | <b>Exclusion</b>                                                                                                                                                                                                                                                                                                               |
|----------------------------------------------------------------------------------------------------------|--------------------------------------------------------------------------------------------------------------------------------------------------------------------------------------------------------------------------------------------------------------------------------------------------------------------------------|
| Study in humans                                                                                          | Animal studies                                                                                                                                                                                                                                                                                                                 |
| Longitudinal studies including cohorts, RCTs, intervention and case-control study designs                | Cross-sectional analyses                                                                                                                                                                                                                                                                                                       |
| Study in adults of any sex/ethnicity                                                                     | Studies in children/adolescents                                                                                                                                                                                                                                                                                                |
| Studies written in English                                                                               | Participants with conditions directly impacting aortic function (including but not limited to): <ul style="list-style-type: none"><li>- Marfan's, coarctation of the aorta</li><li>- Conditions with severe systemic physiological effects likely to lead to atypical aortic changes (e.g. ESRD, systemic sclerosis)</li></ul> |
| Reports numerical association between modifiable risk factor and change in arterial stiffness over time. | Pregnant women                                                                                                                                                                                                                                                                                                                 |
| Follow up duration $\geq 6$ months/24 weeks                                                              | Quantitative change in stiffness not recorded                                                                                                                                                                                                                                                                                  |
|                                                                                                          | Case series                                                                                                                                                                                                                                                                                                                    |
|                                                                                                          | Exclusively studying participants with CKD $\geq 4$ or on dialysis                                                                                                                                                                                                                                                             |
|                                                                                                          | Randomised controlled trials only reporting treatment effects                                                                                                                                                                                                                                                                  |

**Table S2. Characteristics of studies included in the meta-analysis.**

| Study                               | N    | Follow up (years) | Age (years) | SD   | Design         | % Male | Measure | Device       | Distance method       |
|-------------------------------------|------|-------------------|-------------|------|----------------|--------|---------|--------------|-----------------------|
| Tabara et al. <sup>23</sup>         | 8004 | 5                 | 53.1        | 13.3 | Cohort         | 32.4   | CAVI    | Vasera-1500  | From height           |
| McIntyre et al. <sup>22</sup>       | 970  | 5                 | 70          | 8.1  | Cohort         | 39     | cfPWV   | Vicorder     | SSN – FA              |
| Meani et al. <sup>9</sup>           | 333  | 3.75 +- .53       | 54.5        | 12.6 | Cohort         | 56.7   | cfPWV   | Complior     | (CA – FA) * 0.8       |
| Yu et al. <sup>25</sup>             | 801  | up to 7           | 50.8        | 12.9 | Case-control   | 43.3   | baPWV   | MB3000       | (ht–ank) – (ht–arm)   |
| Guo et al. <sup>20</sup>            | 656  | 5.7 (4-7.9)       | 45.2        | 2.9  | Cohort         | 100    | baPWV   | VP2000       | From height           |
| Jennersjö et al. <sup>24</sup>      | 188  | 4                 | 60.4        | 3.3  | Cohort         | 72     | cfPWV   | Sphygmocor   | (SSN–FA) – (SSN–CA)   |
| Ferreira et al. <sup>21</sup>       | 417  | 4.2+-0.6          | 60.4        | 9.5  | Cohort         | 35.7   | cfPWV   | Complior     | (CA – FA) * 0.8       |
| Song et al. <sup>29</sup>           | 271  | 4                 | 53.78       | 6.64 | Interventional | 50     | cfPWV   | CMR          | Direct visualisation  |
| AlGhatrif et al. <sup>42</sup>      | 775  | 9.3+-6            | 59          | 15.7 | Cohort         | 45.4   | cfPWV   | Comp / Sphyg | (SSN-Um-FA)–(SSN-CA)  |
| El Khoudary et al. <sup>27</sup>    | 240  | 4.6+-0.2          | 45          | 2.9  | Cohort         | 100    | cfPWV   | VP2000       | (SSN-Um-FA)–(SSN-CA)  |
| Buchner et al. <sup>26</sup>        | 172  | 0.5               | 48.8        | 14.6 | Interventional | 54.5   | crPWV   | Sphygmocor   | (SN-radial) – (SN-CA) |
| Zanoli et al. <sup>32</sup>         | 167  | 4 (2.5-5.7)       | 38          | 21   | Case-control   | 57     | cfPWV   | Sphygmocor   | (CA – FA) * 0.8       |
| Triantafyllidi et al. <sup>31</sup> | 132  | 2.95+-0.7         | 55          | 11   | Interventional | 53     | cfPWV   | Complior     | FA-CA                 |
| Seidlerová et al. <sup>33</sup>     | 90   | 9.5 (8.5-9.7)     | 66.9        | 5.1  | Cohort         | 20     | cfPWV   | Sphygmocor   | (SSN–FA) – (SSN–CA)   |
| Takaki et al. <sup>43</sup>         | 50   | 1                 | 60.9        | 7    | RCT            | 80     | baPWV   | AT-form      | -                     |
| Maia-Leite et al. <sup>44</sup>     | 91   | 7.6+-2            | 47.9        | 8.1  | Cohort         | 91.7   | cfPWV   | Complior     | (CA – FA) * 0.8       |
| Boutouyrie et al. <sup>30</sup>     | 373  | 2                 | 56.4        | 14.7 | RCT            | 53.6   | cfPWV   | Sphygmocor   | (CA – FA) * 0.8       |
| Karatzis et al. <sup>45</sup>       | 115  | 5                 | 47.8        | 9.1  | Cohort         | 60.9   | cfPWV   | Complior     | (CA – FA) * 0.8       |
| Tam et al. <sup>34</sup>            | 110  | 1                 | 53          | 13   | RCT            | 23     | baPWV   | VP2000       | -                     |
| Li et al. <sup>35</sup>             | 816  | 5                 | 39.1        | 7.8  | Cohort         | 58.3   | cfPWV   | Sphygmocor   | (SSN–FA) – (SSN–CA)   |
| Ohyama et al. <sup>46</sup>         | 1395 | 10                | 60          | 9    | Cohort         | 47     | aPWV    | CMR          | Direct visualisation  |

Study characteristics and method of assessment of arterial stiffness are reported, including by device and method of estimation of aortic length. PWV=pulse wave velocity; CAVI=cardio-ankle vascular index; cfPWV=carotid-femoral; ba=brachial-ankle; cr= carotid-radial; SSN = suprasternal notch; SN=sternal notch; FA= femoral artery; CA = carotid artery.

**Table S3. Measures of study quality which differed between studies; Y=yes, N=No, NR = Not reported.**

| <b>Study</b>                 | <b>Participation &gt;50%</b> | <b>Adequate outcome assessor blinding</b> | <b>Dropout rate &lt;20%</b> |
|------------------------------|------------------------------|-------------------------------------------|-----------------------------|
| Tabara <sup>23</sup>         | Y                            | N                                         | Y                           |
| McIntyre <sup>22</sup>       | Y                            | N                                         | Y                           |
| Meani <sup>9</sup>           | Y                            | N                                         | Y                           |
| Yu <sup>25</sup>             | Y                            | Y                                         | Y                           |
| Guo <sup>20</sup>            | Y                            | N                                         | N                           |
| Jennersjö <sup>24</sup>      | N                            | N                                         | N                           |
| Ferreira <sup>21</sup>       | Y                            | Y                                         | NR                          |
| Song <sup>29</sup>           | Y                            | N                                         | Y                           |
| AlGhatrif <sup>42</sup>      | Y                            | N                                         | Y                           |
| El Khoudary <sup>27</sup>    | Y                            | N                                         | N                           |
| Buchner <sup>26</sup>        | NR                           | N                                         | Y                           |
| Zanoli <sup>32</sup>         | NR                           | Y                                         | NR                          |
| Triantafyllidi <sup>31</sup> | Y                            | N                                         | Y                           |
| Seidlerová <sup>33</sup>     | Y                            | N                                         | N                           |
| Takaki <sup>43</sup>         | NR                           | Y                                         | Y                           |
| Maia-Leite <sup>44</sup>     | Y                            | N                                         | N                           |
| Boutouyrie <sup>30</sup>     | NR                           | Y                                         | Y                           |
| Karatzis <sup>45</sup>       | Y                            | N                                         | Y                           |
| Tam <sup>34</sup>            | Y                            | Y                                         | Y                           |
| Li <sup>35</sup>             | Y                            | N                                         | N                           |
| Ohyama <sup>46</sup>         | NR                           | NR                                        | NR                          |

**Figure S1. PRISMA Flowchart.**

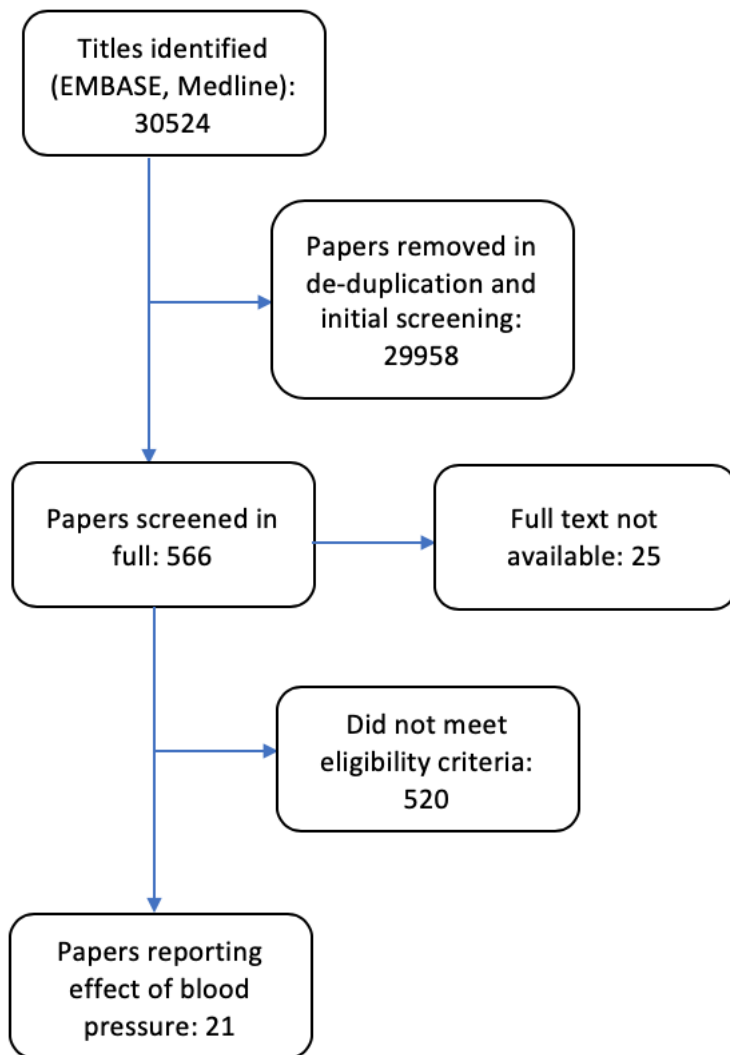

**Figure S2. Assessment of publication bias.**

**A)**

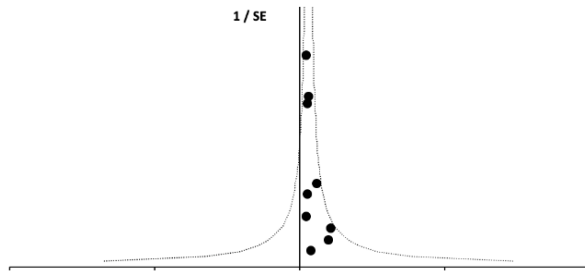

**B)**

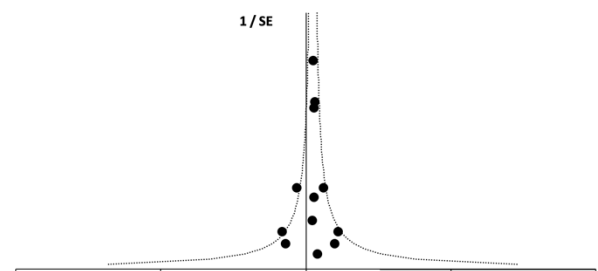

**C)**

| Study                         | N     | StdBeta | CIlow  | CIhigh | p-value | p-Het |
|-------------------------------|-------|---------|--------|--------|---------|-------|
| Sensitivity analysis 3 et al. | 240   | -0.114  | -0.249 | 0.021  | 0.100   |       |
| Sensitivity analysis 2 et al. | 172   | -0.100  | -0.296 | 0.096  | 0.320   |       |
| Sensitivity analysis 1 et al. | 801   | -0.044  | -0.106 | 0.018  | 0.160   |       |
| Guo et al.                    | 656   | 0.030   | -0.073 | 0.133  | 0.570   |       |
| Ferreira et al.               | 417   | 0.033   | 0.009  | 0.057  | 0.007   |       |
| McIntyre et al.               | 970   | 0.037   | -0.033 | 0.107  | 0.300   |       |
| Tabara et al.                 | 8004  | 0.037   | 0.006  | 0.068  | 0.020   |       |
| Meani et al.                  | 333   | 0.040   | 0.010  | 0.070  | 0.009   |       |
| Jennersjö et al.              | 188   | 0.054   | -0.269 | 0.377  | 0.740   |       |
| Yu et al.                     | 801   | 0.080   | 0.018  | 0.142  | 0.010   |       |
| Buchner et al.                | 172   | 0.136   | -0.060 | 0.332  | 0.170   |       |
| El Khoudary et al.            | 240   | 0.150   | 0.015  | 0.285  | 0.030   |       |
| Fixed Effects                 | 12994 | 0.033   | 0.019  | 0.048  | <0.001  |       |
| Random Effects                | 12994 | 0.031   | 0.007  | 0.055  | 0.010   | 0.07  |

A: Funnel plot for the studies reporting adjusted standardised beta-coefficients for the relationship between baseline SBP and progression of arterial stiffness. B: Funnel plot for the studies reporting adjusted standardised beta-coefficients for the relationship between baseline SBP and progression of arterial stiffness, with imputed values for studies greater than 1 SD above the summary value, reflected about 0.036 to estimate effects of possible publication bias. 1/SE = 1/standard error. C: Meta-analysis of standardised, adjusted beta-coefficients for baseline SBP versus progression of arterial stiffness, including imputed values.

**Figure S3. Forest plots showing the magnitude of unadjusted associations between baseline SBP and progression of arterial stiffness.**

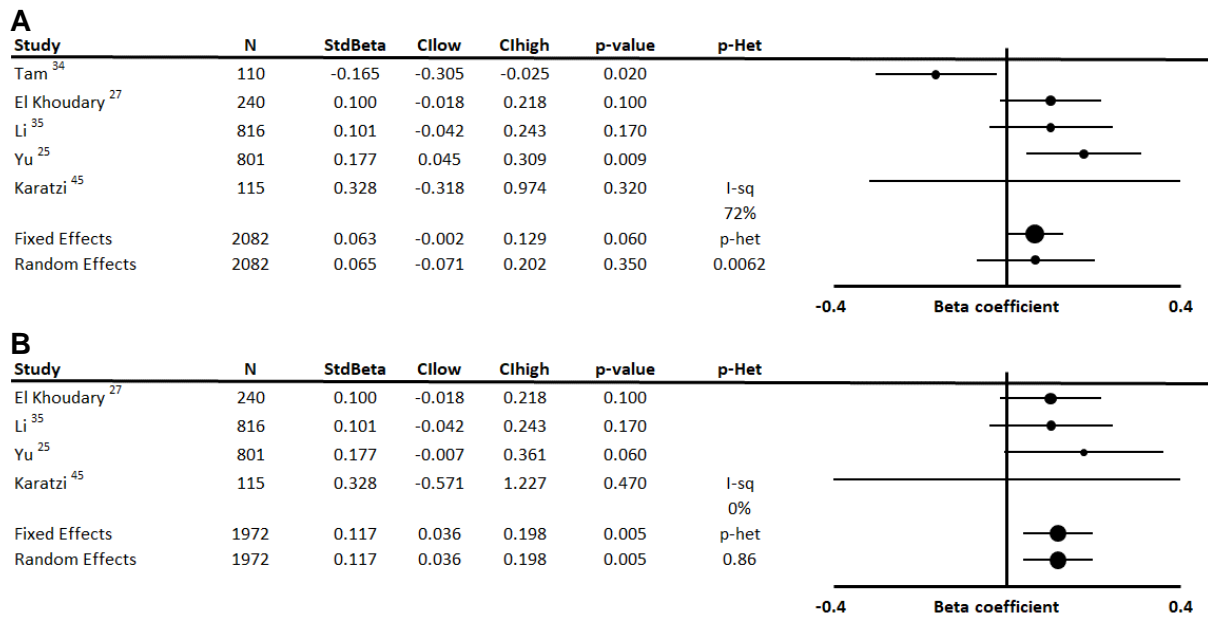

A: Unadjusted relationships between baseline SBP and progression of arterial stiffness. B: Unadjusted relationships between baseline SBP and progression of arterial stiffness, excluding interventional studies. Effects were analysed by both fixed and random effects meta-analysis weighted by the inverse variance. StdBeta – Standardised regression coefficient; CIlow – confidence interval lower limit; CIhigh – confidence interval upper limit; p-Het – p-value for heterogeneity; N – number of subjects; I-sq –  $I^2$  statistic.



**Figure S4. Forest plot of the effect of baseline age on annual progression of arterial stiffness by meta-analysis of standardised beta regression coefficients from analyses, adjusted for demographic variables.**

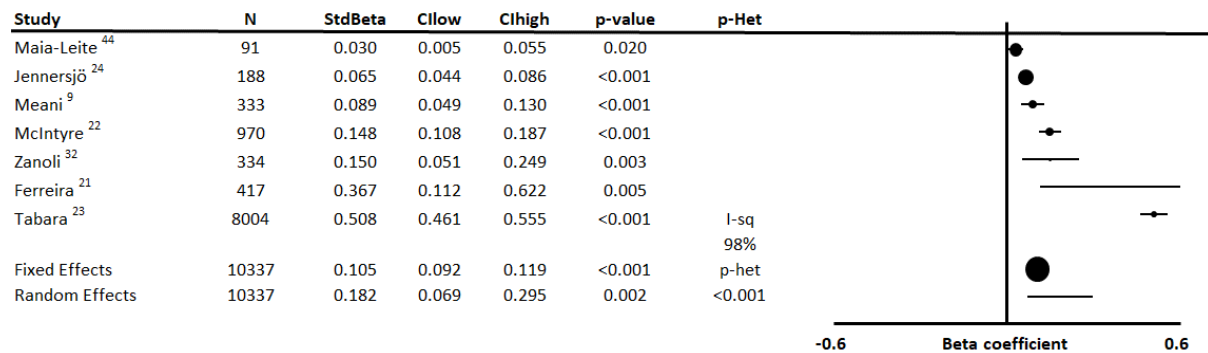

Effects were analysed by both fixed and random effects meta-analysis weighted by the inverse variance. StdBeta – Standardised regression coefficient; Clow – confidence interval lower limit; Chigh – confidence interval upper limit; p-Het – p-value for heterogeneity; N – number of subjects; I-sq –  $I^2$  statistic

**Figure S5. Associations between baseline SBP and progression of arterial stiffness, only including studies reporting associations adjusted for baseline age.**

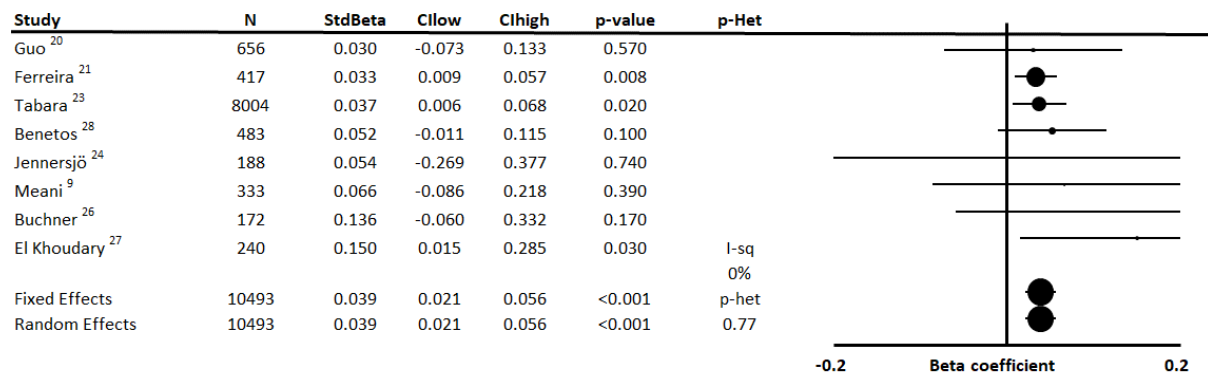

Effects were analysed by both fixed and random effects meta-analysis weighted by the inverse variance. StdBeta – Standardised regression coefficient; CIlow – confidence interval lower limit; CIhigh – confidence interval upper limit; p-Het – p-value for heterogeneity; N – number of subjects; I-sq –  $I^2$  statistic.

**Figure S6. Associations between baseline SBP and progression of arterial stiffness, including studies reporting associations adjusted for baseline age and baseline arterial stiffness.**

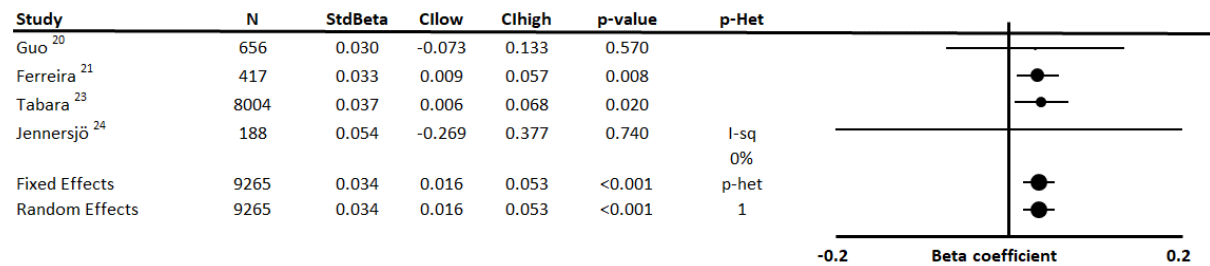

Effects were analysed by both fixed and random effects meta-analysis weighted by the inverse variance. StdBeta – Standardised regression coefficient; CIlow – confidence interval lower limit; CIhigh – confidence interval upper limit; p-Het – p-value for heterogeneity; N – number of subjects; I-sq –  $I^2$  statistic.
